# Supplementary material
Source: HighWire-hosted journal article supplement (https://www.cmajopen.ca/highwire/filestream/84924/field_highwire_adjunct_files/1/2020-0155-Original-submission.pdf)
Supplement: 2020-0155-Original-submission.pdf [file 2020-0155-Original-submission.pdf]

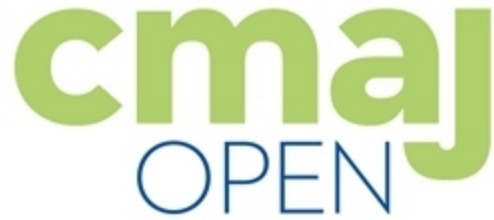

**The Association Between the Legalization of Recreational Cannabis and Fatal Motor Vehicle Collisions in the United States: An Ecological Study**

|                               |                                                                                                                                                                                                                                                                                                                                                                                                                                                                                                                                                                                                                                                                                                                                                                                                                                                                                                                                                                                                                                                                                          |
|-------------------------------|------------------------------------------------------------------------------------------------------------------------------------------------------------------------------------------------------------------------------------------------------------------------------------------------------------------------------------------------------------------------------------------------------------------------------------------------------------------------------------------------------------------------------------------------------------------------------------------------------------------------------------------------------------------------------------------------------------------------------------------------------------------------------------------------------------------------------------------------------------------------------------------------------------------------------------------------------------------------------------------------------------------------------------------------------------------------------------------|
| Journal:                      | <i>CMAJ Open</i>                                                                                                                                                                                                                                                                                                                                                                                                                                                                                                                                                                                                                                                                                                                                                                                                                                                                                                                                                                                                                                                                         |
| Manuscript ID                 | CMAJOpen-2020-0155                                                                                                                                                                                                                                                                                                                                                                                                                                                                                                                                                                                                                                                                                                                                                                                                                                                                                                                                                                                                                                                                       |
| Manuscript Type:              | Other                                                                                                                                                                                                                                                                                                                                                                                                                                                                                                                                                                                                                                                                                                                                                                                                                                                                                                                                                                                                                                                                                    |
| Date Submitted by the Author: | 30-Jun-2020                                                                                                                                                                                                                                                                                                                                                                                                                                                                                                                                                                                                                                                                                                                                                                                                                                                                                                                                                                                                                                                                              |
| Complete List of Authors:     | Windle, Sarah; Jewish General Hospital, McGill University, Cardiology and Clinical Epidemiology<br>Eisenberg, Mark Jeffrey; Jewish General Hospital, McGill University, Cardiology and Clinical Epidemiology;<br>Reynier, Pauline; Jewish General Hospital, McGill University, Cardiology and Clinical Epidemiology<br>Cabaussel, Josselin; Jewish General Hospital, McGill University, Clinical Epidemiology<br>Thombs, Brett; Jewish General Hospital, Psychiatry<br>Grad, Roland; Jewish General Hospital, Herzl Family Practice Centre<br>Ells, Carolyn; McGill University, Biomedical Ethics Unit<br>Sequeira, Crystal; Jewish General Hospital, McGill University, Cardiology and Clinical Epidemiology<br>Filion, Kristian; McGill University, Medicine and Epidemiology                                                                                                                                                                                                                                                                                                          |
| Keywords:                     | Health policy, Epidemiology, Public health                                                                                                                                                                                                                                                                                                                                                                                                                                                                                                                                                                                                                                                                                                                                                                                                                                                                                                                                                                                                                                               |
| More Detailed Keywords:       | Recreational cannabis legalization, Fatal motor vehicle collisions, Ecological study                                                                                                                                                                                                                                                                                                                                                                                                                                                                                                                                                                                                                                                                                                                                                                                                                                                                                                                                                                                                     |
| Abstract:                     | <p>Background: With the recent legalization of recreational cannabis in Canada, cannabis-impaired driving is an important public safety concern. Therefore, our aim was to examine the association between recreational cannabis legalization and fatal motor vehicle collisions using data from the United States, which present a timely natural experiment of legalization.</p> <p>Methods: We retrieved the number of fatal motor vehicle collisions and the associated number of deaths for all 50 states and the District of Columbia (2007-2018) from the United States Fatality Analysis Reporting System. We used empirical best linear unbiased predictor random-effects models to examine rates of fatal motor vehicle collisions and associated deaths across all jurisdictions with and without recreational cannabis legalization.</p> <p>Results: After adjusting for calendar time and clustering by jurisdiction, legalization was associated with significant increases in rates of fatal motor vehicle collisions (rate ratio [RR]: 1.09; 95% confidence interval</p> |

1  
2  
3  
4  
5  
6  
7  
8  
9  
10  
11  
12  
13  
14  
15  
16  
17  
18  
19  
20  
21  
22  
23  
24  
25  
26  
27  
28  
29  
30  
31  
32  
33  
34  
35  
36  
37  
38  
39  
40  
41  
42  
43  
44  
45  
46  
47  
48  
49  
50  
51  
52  
53  
54  
55  
56  
57  
58  
59  
60

|  |                                                                                                                                                                                                                                                                                                                                                                                                                                                                                                                                                                                                                                                                                                                                                                |
|--|----------------------------------------------------------------------------------------------------------------------------------------------------------------------------------------------------------------------------------------------------------------------------------------------------------------------------------------------------------------------------------------------------------------------------------------------------------------------------------------------------------------------------------------------------------------------------------------------------------------------------------------------------------------------------------------------------------------------------------------------------------------|
|  | <p>[CI] 1.07-1.11) and associated deaths (RR: 1.09; 95% CI 1.07-1.11). There was no difference in rates of fatal motor vehicle collisions (RR: 0.99; 95% CI 0.96-1.02) or associated deaths (RR: 1.01; 95% CI 0.98-1.05) in the first 12 months of legalization relative to subsequent months.</p> <p>Interpretation: Recreational cannabis legalization in the United States was associated with a 9% relative increased risk of fatal motor vehicle collisions and associated deaths, with no difference between the first and subsequent years of legalization. These findings raise concern that there could be a similar increase in Canada following the legalization of recreational cannabis, and that this increase could be sustained over time.</p> |
|  |                                                                                                                                                                                                                                                                                                                                                                                                                                                                                                                                                                                                                                                                                                                                                                |

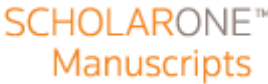

# The Association Between the Legalization of Recreational Cannabis and Fatal Motor Vehicle Collisions in the United States: An Ecological Study

Sarah B. Windle MPH,<sup>1</sup> Mark J. Eisenberg MD MPH,<sup>1,2,3</sup> Pauline Reynier MSc,<sup>1</sup>  
Josselin Cabaussel MSc,<sup>1</sup> Brett D. Thombs PhD,<sup>1,2,4</sup> Roland Grad MD MSc,<sup>1,5</sup>  
Carolyn Ells PhD,<sup>1,5,6</sup> Crystal Sequeira MScA,<sup>1</sup> Kristian B. Filion PhD<sup>1,2</sup>

<sup>1</sup>Lady Davis Institute, Jewish General Hospital, Montreal, Quebec, Canada

<sup>2</sup>Departments of Medicine and of Epidemiology, Biostatistics and Occupational Health, McGill University, Montreal, Quebec, Canada

<sup>3</sup>Division of Cardiology, Jewish General Hospital, Montreal, Quebec, Canada

<sup>4</sup>Departments of Psychiatry, of Psychology, and of Educational and Counselling Psychology, McGill University, Montreal, Quebec, Canada

<sup>5</sup>Department of Family Medicine, McGill University, Montreal, Quebec, Canada

<sup>6</sup>Department of Medicine, Divisions of Ethics and Policy and of Experimental Medicine, McGill University, Montreal, Quebec, Canada

**Word Count (Introduction to Conclusions): 2,393 / 2,500**

**Abstract Word Count: 250**

## Address for Correspondence:

Kristian B. Filion, PhD, FAHA  
Associate Professor and William Dawson Scholar  
Departments of Medicine and of Epidemiology, Biostatistics, and Occupational Health  
McGill University  
3755 Cote Ste-Catherine Road, Suite H410.1  
Montreal, Quebec, Canada  
Telephone: (514) 340-8222 Ext. 28394  
Fax: (514) 340-7564  
Email: [kristian.filion@mcgill.ca](mailto:kristian.filion@mcgill.ca)

This study was funded by the Canadian Institutes of Health Research (#SHI-155407). Dr. Filion is supported by a Senior Research Scholar award from the *Fonds de recherche du Québec – Santé* (FRQS; Quebec Foundation for Research – Health) and a William Dawson Scholar award from McGill University. Dr. Thombs is supported by a FRQS research salary award.

The authors have no conflicts of interest to disclose.

## ABSTRACT

**Background:** With the recent legalization of recreational cannabis in Canada, cannabis-impaired driving is an important public safety concern. Therefore, our aim was to examine the association between recreational cannabis legalization and fatal motor vehicle collisions using data from the United States, which present a timely natural experiment of legalization.

**Methods:** We retrieved the number of fatal motor vehicle collisions and the associated number of deaths for all 50 states and the District of Columbia (2007-2018) from the United States Fatality Analysis Reporting System. We used empirical best linear unbiased predictor random-effects models to examine rates of fatal motor vehicle collisions and associated deaths across all jurisdictions with and without recreational cannabis legalization.

**Results:** After adjusting for calendar time and clustering by jurisdiction, legalization was associated with significant increases in rates of fatal motor vehicle collisions (rate ratio [RR]: 1.09; 95% confidence interval [CI] 1.07-1.11) and associated deaths (RR: 1.09; 95% CI 1.07-1.11). There was no difference in rates of fatal motor vehicle collisions (RR: 0.99; 95% CI 0.96-1.02) or associated deaths (RR: 1.01; 95% CI 0.98-1.05) in the first 12 months of legalization relative to subsequent months.

**Interpretation:** Recreational cannabis legalization in the United States was associated with a 9% relative increased risk of fatal motor vehicle collisions and associated deaths, with no difference between the first and subsequent years of legalization. These findings raise concern that there could be a similar increase in Canada following the legalization of recreational cannabis, and that this increase could be sustained over time.

## INTRODUCTION

Canada legalized recreational cannabis on a national scale on October 17, 2018. By 2019, more than 5.1 million Canadians (16.8% of the population aged 15 or older) reported cannabis use in the past three months (compared to 14.9% before legalization in 2018).(1) While legalization better aligned the law with Canadian values and practices, it raised public health concerns regarding impaired driving.(2) Among individuals who reported any cannabis use in the past three months, 13.2% reported driving within two hours of cannabis consumption.(1) Among daily or almost daily cannabis users, 28.8% reported driving within two hours of consumption.(1) The relationship between cannabis use and impaired driving is complicated by varied methods of consumption (e.g., smoking, vaping, edibles), individual factors (e.g., metabolism, frequency of use), and time since consumption, as well as challenges in the reliable assessment of cannabis impairment.(3) However, cannabis is known to affect psychomotor skills necessary for driving, including critical tracking, divided attention, and reaction time.(4) Despite this knowledge, few studies have examined the impact of large-scale public policies which increased access to cannabis on impaired driving and related outcomes. Given the varied approaches taken to cannabis regulation by different jurisdictions in the United States,(5) data from the United States present a timely natural experiment to assess the impact of recreational cannabis legalization. Therefore, our objective was to examine the association between recreational cannabis legalization and the rate of fatal motor vehicle collisions in the United States to inform impaired driving policy and public health prevention measures in Canada.

## METHODS

We performed an ecological study to examine the association between recreational cannabis legalization and fatal motor vehicle collisions and associated deaths in the United States between

1  
2  
3 2007 and 2018. The numbers of fatal motor vehicle collisions and deaths due to motor vehicle  
4 collisions (as each collision could result in more than one fatality) were retrieved by month for all  
5  
6 50 states and the District of Columbia from the United States Fatality Analysis Reporting System  
7  
8 (FARS).(6) The FARS database includes collisions which occurred on public roadways and  
9  
10 resulted in at least one death within 30 days. We selected 2007 as the start of our study period to  
11  
12 include at least five years prior to the first year in which legalized recreational cannabis was in  
13  
14 effect (2012). The most recent year of FARS data available at the time of analysis (April 2020)  
15  
16 was 2018.  
17  
18  
19  
20

21  
22 Exposure was defined using a time-dependent approach using two categories: 1) legalized  
23 recreational cannabis; and 2) no legalization of recreational cannabis (the reference group). For  
24 the primary analyses, we defined legalization for each jurisdiction as the date for which  
25 recreational cannabis legalization was in effect, rounded up or down to the nearest full month.  
26  
27 Jurisdictions for which legalization was in effect prior to 2019 contributed person-time of  
28  
29 observation (determined using the population of each jurisdiction between 2007 and 2018)(7) and  
30  
31 fatal motor vehicle collision data to both legalized and non-legalized categories in the analysis,  
32  
33 with all remaining jurisdictions contributing data for non-legalized recreational cannabis only.  
34  
35  
36  
37  
38  
39

## 40 **Statistical Analyses**

41  
42 We used empirical best linear unbiased predictor random-effects models to examine the  
43  
44 rates of fatal motor vehicle collisions and associated deaths across all jurisdictions with and  
45  
46 without recreational cannabis legalization. Rates were estimated per 100,000 person-years for  
47  
48 years during which recreational cannabis was legal and not legal for each state and the District of  
49  
50 Columbia between 2007 and 2018. We then determined crude and adjusted rate ratios (RRs) and  
51  
52 95% confidence intervals (CIs) for the associations between legalization and 1) fatal motor vehicle  
53  
54  
55  
56  
57  
58  
59  
60

1  
2  
3 collisions; and 2) fatalities due to motor vehicle collisions. Models included a random-effect to  
4  
5 account for clustering by jurisdiction. The primary analyses were adjusted for calendar year as a  
6  
7 categorical variable to account for underlying time trends (e.g., baseline trends in substance use  
8  
9 and driving, impaired driving policies). In sensitivity analyses, we adjusted for calendar year as a  
10  
11 continuous variable.  
12  
13

14  
15 Two secondary analyses were performed. In the first, we defined exposure using the date  
16  
17 commercial cannabis dispensaries opened (rounded up or down to the nearest full month) instead  
18  
19 of the date legalization was in effect. In the second, we sub-categorized data from legalized months  
20  
21 (or months in which commercial dispensaries were opened) into the first 12 months and subsequent  
22  
23 months to assess if any observed increased risk was short-term. Rates from the first 12 months and  
24  
25 subsequent months were then compared to each other and to those from non-legalized periods. All  
26  
27 analyses were conducted using SAS Version 9.4.  
28  
29

### 30 31 **Ethics Approval**

32  
33 Ethics approval was not required for this research as it used publicly available data.  
34

## 35 36 **RESULTS**

37  
38 As of June 2020, 11 states and the District of Columbia had passed legalized recreational  
39  
40 cannabis legislation (Table 1).(8) Legalization was in effect in 11 jurisdictions prior to 2019:  
41  
42 Washington and Colorado (2012); Alaska, the District of Columbia, and Oregon (2015); California  
43  
44 and Massachusetts (2016); Nevada and Maine (2017); and Vermont and Michigan (2018).  
45  
46 Recreational cannabis legalization came into effect in Illinois on January 1, 2020, however FARS  
47  
48 data were only available through 2018; therefore, Illinois contributed data for non-legalized  
49  
50 months only. Among jurisdictions with legalization, commercial dispensaries were open in seven  
51  
52 states prior to 2019 (Alaska, California, Colorado, Massachusetts, Nevada, Oregon, and  
53  
54  
55  
56  
57  
58  
59  
60

1  
2  
3 Washington). The remaining jurisdictions either do not currently plan to allow commercial  
4 dispensaries (District of Columbia and Vermont) or opened/plan to open dispensaries after the  
5 study period (Michigan in 2019 and Maine in 2020).  
6  
7  
8  
9

10 A total of 389,396 fatal motor vehicle collisions occurred in the United States between  
11 2007 and 2018, resulting in 424,785 deaths (Table 2). Of these collisions, 17,116 occurred in  
12 jurisdictions where recreational cannabis was legal, resulting in 18,580 fatalities (Table 2). After  
13 adjusting for calendar time and clustering by jurisdiction, legalization was associated with  
14 increased rates of fatal motor vehicle collisions (RR: 1.09; 95% CI 1.07-1.11) and deaths from  
15 motor vehicle collisions (RR: 1.09; 95% CI 1.07, 1.11). When analyses used the date commercial  
16 dispensaries opened, rather than the date legalization was in effect, the findings were virtually  
17 identical for the risk of motor vehicle collisions (RR: 1.08; 95% CI 1.05-1.10) and deaths from  
18 motor vehicle collisions (RR: 1.08; 95% CI 1.06-1.11).  
19  
20  
21  
22  
23  
24  
25  
26  
27  
28  
29  
30

31 In secondary analyses, we compared the rates of fatal motor vehicle collisions and  
32 associated deaths in the first 12 months of legalization versus subsequent months of legalization  
33 (Table 3). After adjusting for calendar time and clustering by jurisdiction, there was no difference  
34 in the first 12 months versus subsequent months of legalization in the rates of fatal motor vehicle  
35 collisions (RR: 0.99; 95% CI 0.96-1.02) or deaths from motor vehicle collisions (RR: 1.01; 95%  
36 CI 0.98-1.05). In contrast, when analyses used the date commercial dispensaries opened rather  
37 than the date legalization was in effect, we found decreased rates of fatal motor vehicle collisions  
38 (RR: 0.94; 95% CI 0.90-0.98) and deaths from motor vehicle collisions (RR: 0.94; 95% CI 0.91-  
39 0.98) in the first 12 months compared to subsequent months.  
40  
41  
42  
43  
44  
45  
46  
47  
48  
49  
50

51 Sensitivity analyses which adjusted for calendar time as a continuous rather than  
52 categorical variable produced slightly stronger associations between legalization (and open  
53  
54  
55  
56  
57  
58  
59  
60



1  
2  
3 dispensaries) and the risk of fatal motor vehicle collisions and associated fatalities (Supplementary  
4 Table 1). Adjusting for calendar time as a continuous variable produced similarly decreased rates  
5  
6 of fatal motor vehicle collisions and associated deaths in the first 12 months of open commercial  
7  
8 dispensaries compared to subsequent months (Supplementary Table 2).  
9

## 10 11 12 **INTERPRETATION**

13  
14 We found that recreational cannabis legalization in United States' jurisdictions was  
15 associated with a relative 9% increased risk of fatal motor vehicle collisions and associated deaths,  
16  
17 with no difference between the first and subsequent years of legalization. In 2018, an estimated  
18  
19 30,270 motor vehicle fatalities occurred in jurisdictions without legalized recreational cannabis;  
20  
21 these results suggest that legalization on a national scale could result in an additional 2,765 motor  
22  
23 vehicle fatalities per year in the United States.  
24  
25  
26  
27

28 Previous literature concerning the association between cannabis legalization and impaired  
29 driving is limited. A small number of observational studies suggest that medical and/or recreational  
30  
31 cannabis legalization may increase the proportion of drivers with detectable levels of cannabis in  
32  
33 analyses of blood or urine; however, these observations may be confounded by increases in  
34  
35 enforcement activities and cannabis testing and reporting following legalization.(9-12) Likewise,  
36  
37 an increase in detectable levels of cannabis (e.g., due to increased use following legalization)  
38  
39 would not necessarily correspond directly to increases in impaired driving.(3) Another study found  
40  
41 an increase in self-reported driving under the influence of cannabis following legalization.(13)  
42  
43 However, individuals may be more likely to report cannabis use and temporally-associated driving  
44  
45 after cannabis use is legal.  
46  
47  
48  
49  
50

51 Several previous studies have been reported that used ecological approaches which did not  
52  
53 rely on the measurement and reporting of the presence of cannabis or self-reported impaired  
54  
55  
56  
57

1  
2  
3 driving data. Aydelotte et al. (2019) used a differences-in-differences approach to compare  
4 changes in fatal motor vehicle collisions associated with legalization, using FARS data (2007-  
5 2017) from Colorado and Washington and nine control states.(14) Their analysis suggested a  
6 potential increase in fatal motor vehicle collisions in Colorado and Washington in the five years  
7 after recreational cannabis legalization (+1.2 crashes/billion vehicle miles traveled; 95% CI -0.6,  
8 2.1). In their study, legalization was associated with an increase in fatal motor vehicle collisions  
9 when the date of commercial dispensaries opening was used (+1.8 crashes/billion vehicle miles  
10 traveled; 95% CI 0.4, 3.7). Santaella-Tenoerio et al. (2020) examined similar data (2005-2017)  
11 from Colorado and Washington which were compared with synthetic reference groups (created  
12 from a pool of comparison states best resembling fatality rates of the exposed states pre-  
13 legalization).(15) The study found an increase in motor vehicle fatalities in Colorado (+1.5  
14 fatalities/billion vehicle miles traveled;  $p = 0.047$ ) but not in Washington (+0.08 fatalities/billion  
15 vehicle miles traveled;  $p = 0.67$ ) following the legalization of recreational cannabis retail sales.  
16 The authors hypothesized that higher retail density, cannabis use, and cannabis tourism in  
17 Colorado relative to Washington may have contributed to the observed increase in traffic fatalities  
18 in Colorado.

19  
20  
21  
22  
23  
24  
25  
26  
27  
28  
29  
30  
31  
32  
33  
34  
35  
36  
37  
38  
39  
40 Two additional ecological studies included data from other states with recreational  
41 cannabis legalization. Kamer et al. (2020) used a differences-in-differences approach to compare  
42 motor vehicle fatalities reported in FARS (2008-2018) in Colorado, Washington, Oregon, and  
43 Alaska to the 20 states without legalized recreational or medical cannabis as of the beginning of  
44 2018.(16) After adjusting for covariates, this study found an increase in motor vehicle fatalities  
45 (+2.1 fatalities/billion vehicle miles traveled; 95% CI 1.3-3.0) following the opening of  
46 recreational cannabis retail stores. Lane et al. (2019) used data from the Centers for Disease  
47  
48  
49  
50  
51  
52  
53  
54  
55  
56  
57  
58  
59  
60

1  
2  
3 Control and Prevention's Wide-Ranging Online Data for Epidemiologic Research (WONDER)  
4 web application and RoadSafetyBC to examine changes in traffic fatalities occurring between  
5  
6 2009 and 2016 in three states with recreational cannabis legalization (Colorado, Washington, and  
7  
8 Oregon), using neighboring jurisdictions without legalization as comparators.(17) The authors  
9  
10 conducted an interrupted time-series analysis of traffic fatality rates using generalized least squares  
11  
12 regression models adjusted for seasonality and autocorrelation to test the association between  
13  
14 legalization and traffic fatalities. They found a pooled step increase of 1.08 traffic fatalities per  
15  
16 million residents ( $p < 0.001$ ), suggesting an increase in traffic fatalities less than one year following  
17  
18 legalization, followed by a reduction in trend of 0.06 per month ( $p < 0.001$ ).  
19  
20  
21  
22  
23

24 Our analysis extends the findings of these previous studies by including an additional seven  
25  
26 jurisdictions with recreational cannabis legalization through 2018. Overall, our results support  
27  
28 previous literature which suggest that recreational cannabis legalization is associated with  
29  
30 increased impaired driving. In contrast to Lane et al. (2019), our findings additionally suggest that  
31  
32 this increase may be sustained over time. We found fatal collisions and associated deaths to be  
33  
34 lower in the first 12 months following the opening of commercial dispensaries, compared to  
35  
36 subsequent years. This may be due to relatively limited cannabis availability in many jurisdictions  
37  
38 during the first year when dispensaries were open (e.g., fewer stores open, product shortages due  
39  
40 to high demand), which might deter new cannabis users in particular. While we might have  
41  
42 expected a similar finding for the first 12 months of legalization, the lack of difference could be  
43  
44 related to lower cannabis availability across multiple early years of legalization (e.g., commercial  
45  
46 dispensaries opened more than two years after legalization in Colorado and Washington), making  
47  
48 subsequent years more similar to the first year of legalization.  
49  
50  
51  
52  
53  
54  
55  
56  
57  
58  
59  
60

1  
2  
3 In Canada, a total of 1,922 motor vehicle fatalities were reported in 2018; a relative increase  
4 of 9% would correspond to 173 additional deaths yearly.(18) However, the national approach taken  
5 to recreational cannabis legalization may have the potential to mitigate increases in impaired  
6 driving in Canada. For example, Bill C-46 (2018) established national “*per se*” driving limits for  
7 THC, with corresponding minimum penalties for exceeding these limits.(19) While these limits  
8 are controversial owing to a lack of direct correlation between THC levels and driving  
9 impairment,(20, 21) public awareness of the establishment of legal limits alone has the potential  
10 to decrease substance-impaired driving.(22, 23) Among the 11 United States jurisdictions which  
11 contributed legalized months to our analyses, seven did not have a threshold limit for THC.(24)  
12 Overall, our analysis suggests that Canada should remain vigilant to the potential for increases in  
13 cannabis-impaired driving.  
14  
15  
16  
17  
18  
19  
20  
21  
22  
23  
24  
25  
26  
27

### 28 **Limitations**

29  
30 Our study has potential limitations. First, our study is observational and there are a number  
31 of factors which vary between jurisdictions and are likely to influence fatal motor vehicle  
32 collisions (e.g., substance use, population density, speed limits). While our analyses included a  
33 random-effects term to account for clustering by jurisdiction and we adjusted for calendar time to  
34 account for temporal trends, confounding remains possible. Second, in contrast to previous studies,  
35 we did not select neighbouring or matched control jurisdictions as comparators. Our approach  
36 included data from all 50 states and the District of Columbia, with all jurisdictions contributing  
37 data from non-legalized months, which served as the comparator for legalized months. Given the  
38 growing number of United States jurisdictions with legalized cannabis, this approach maximizes  
39 the available data and minimizes the effect of spillover (i.e., residents of neighboring states without  
40  
41  
42  
43  
44  
45  
46  
47  
48  
49  
50  
51  
52  
53  
54  
55  
56  
57  
58  
59  
60

1  
2  
3 legalization consuming cannabis purchased in states with legalized cannabis) on the analyses of  
4  
5 association.  
6

## 7 8 **CONCLUSIONS** 9

10 Our analysis of data from the United States suggests that there is the potential for an  
11 important increase in fatal motor vehicle collisions following the legalization of recreational  
12 cannabis in Canada. While differences between the United States and Canada may mitigate  
13 potential increases in impaired driving, the observed 9% relative increase in fatal motor vehicle  
14 collisions and associated deaths could result in 173 additional road fatalities annually in Canada.  
15  
16  
17  
18  
19  
20  
21  
22  
23  
24  
25  
26  
27  
28  
29  
30  
31  
32  
33  
34  
35  
36  
37  
38  
39  
40  
41  
42  
43  
44  
45  
46  
47  
48  
49  
50  
51  
52  
53  
54  
55  
56  
57  
58  
59  
60

Confidential

## ACKNOWLEDGEMENTS

The authors would like to thank Hanan Abramovici, PhD for his helpful suggestions.

## DATA SHARING STATEMENT

Data used in this interrupted time-series analysis were accessed from the publicly-available FARS database. These data are available at <https://www-fars.nhtsa.dot.gov/Main/index.aspx>.

## CONTRIBUTIONS OF AUTHORS

Drs. Filion and Eisenberg conceived of the study idea and supervised the study. Ms. Windle drafted the manuscript, and Ms. Reynier and Mr. Cabaussel conducted the statistical analyses. All authors contributed to the study design, the interpretation of data, and approved the final version of the manuscript. Dr. Filion is the guarantor.

## REFERENCES

1. Statistics Canada. What has changed since cannabis was legalized? Ottawa, ON: Government of Canada; 2020 [cited June 9, 2020]. Available from: <https://www150.statcan.gc.ca/n1/pub/82-003-x/2020002/article/00002-eng.htm>.
2. Cox C. The Canadian Cannabis Act legalizes and regulates recreational cannabis use in 2018. Health policy (Amsterdam, Netherlands). 2018;122(3):205-9.
3. Government of Canada. A Framework for the Legalization and Regulation of Cannabis in Canada. Ottawa, ON: Health Canada Task Force on Cannabis Legalization and Regulation; 2016 [cited July 5, 2019]. Available from: <http://healthycanadians.gc.ca/task-force-marijuana-groupe-etude/framework-cadre/alt/framework-cadre-eng.pdf>.
4. Hartman RL, Huestis MA. Cannabis effects on driving skills. Clin Chem. 2013;59(3):478-92.
5. Lancione S, Wade K, Windle SB, Filion KB, Thombs BD, Eisenberg MJ. Non-medical cannabis in North America: an overview of regulatory approaches. Public Health. 2019;178:7-14.
6. National Highway Traffic Safety Administration. Fatality Analysis Reporting System (FARS) Encyclopedia. Washington, DC: United States Department of Transportation; 2020 [cited June 9, 2020]. Available from: <https://www-fars.nhtsa.dot.gov/Main/index.aspx>.
7. Insurance Institute for Highway Safety. Fatality Facts 2018 State by State. Arlington, VA: Insurance Institute for Highway Safety, Highway Loss Data Institute; 2020 [cited April 6, 2020]. Available from: <https://www.iihs.org/topics/fatality-statistics/detail/state-by-state>.
8. ProCon.org. Legal Recreational Marijuana States and DC. Santa Monica, CA: ProCon.org; 2019 [cited June 20, 2019]. Available from: <https://marijuana.procon.org/view.resource.php?resourceID=006868>. [

- 1  
2  
3 9. Tefft BC, Arnold LS, Grabowski JG. Prevalence of Marijuana Involvement in Fatal Crashes:  
4  
5 Washington, 2010-2014. Washington, DC: AAA Foundation for Traffic Safety; 2016 [cited July  
6  
7 5, 2019]. Available from: [https://aaafoundation.org/wp-](https://aaafoundation.org/wp-content/uploads/2017/12/PrevalenceOfMarijuanaInvolvement.pdf)  
8  
9 [content/uploads/2017/12/PrevalenceOfMarijuanaInvolvement.pdf](https://aaafoundation.org/wp-content/uploads/2017/12/PrevalenceOfMarijuanaInvolvement.pdf).  
10  
11
- 12 10. Sevigny EL. The effects of medical marijuana laws on cannabis-involved driving. *Accid Anal*  
13  
14 *Prev.* 2018;118:57-65.  
15  
16
- 17 11. Chung C, Salottolo K, Tanner A, 2nd, Carrick MM, Madayag R, Berg G, et al. The impact of  
18  
19 recreational marijuana commercialization on traumatic injury. *Inj Epidemiol.* 2019;6(1):3.  
20  
21
- 22 12. Hansen B, Miller K, Weber C. Early evidence on recreational marijuana legalization and traffic  
23  
24 fatalities. *Economic Inquiry.* 2020;58(2):547-68.  
25
- 26 13. Fink DS, Stohl M, Sarvet AL, Cerda M, Keyes KM, Hasin DS. Medical marijuana laws and driving  
27  
28 under the influence of marijuana and alcohol. *Addiction (Abingdon, England).* 2020.  
29  
30
- 31 14. Aydelotte JD, Mardock AL, Mancheski CA, Quamar SM, Teixeira PG, Brown CVR, et al. Fatal  
32  
33 crashes in the 5 years after recreational marijuana legalization in Colorado and Washington. *Accid*  
34  
35 *Anal Prev.* 2019;132:105284.  
36  
37
- 38 15. Santaella-Tenorio J, Wheeler-Martin K, DiMaggio CJ, Castillo-Carniglia A, Keyes KM, Hasin D,  
39  
40 et al. Association of Recreational Cannabis Laws in Colorado and Washington State With Changes  
41  
42 in Traffic Fatalities, 2005-2017. *JAMA Internal Medicine.* 2020.  
43  
44
- 45 16. Kamer RS, Warshafsky S, Kamer GC. Change in Traffic Fatality Rates in the First 4 States to  
46  
47 Legalize Recreational Marijuana. *JAMA Internal Medicine.* 2020.  
48
- 49 17. Lane TJ, Hall W. Traffic fatalities within US states that have legalized recreational cannabis sales  
50  
51 and their neighbours. *Addiction (Abingdon, England).* 2019;114:847-56.  
52  
53  
54  
55  
56  
57



- 1  
2  
3 18. Government of Canada. Canadian Motor Vehicle Traffic Collision Statistics: 2018. Ottawa, ON:  
4  
5 Government of Canada; 2020 [cited June 4, 2020]. Available from:  
6  
7 [https://www.tc.gc.ca/eng/motorvehiclesafety/canadian-motor-vehicle-traffic-collision-statistics-](https://www.tc.gc.ca/eng/motorvehiclesafety/canadian-motor-vehicle-traffic-collision-statistics-2018.html)  
8  
9 [2018.html](https://www.tc.gc.ca/eng/motorvehiclesafety/canadian-motor-vehicle-traffic-collision-statistics-2018.html).  
10  
11  
12 19. Parliament of Canada. Bill C-46. Ottawa, ON: Parliament of Canada; 2018 [cited February 26,  
13  
14 2019]. Available from: <http://www.parl.ca/DocumentViewer/en/42-1/bill/C-46/royal-assent>.  
15  
16  
17 20. Peaire A, Filbert A, Smith D, Beirness D., et al. Report on Drug Per Se Limits. Ottawa, ON:  
18  
19 Canadian Society of Forensic Sciences; 2017 [cited June 20, 2019]. Available from:  
20  
21 <https://www.csfs.ca/wp-content/uploads/2017/09/Report-on-Drug-Per-Se-Limit.pdf>.  
22  
23  
24 21. Roth A. The Uneasy Case for Marijuana as Chemical Impairment Under a Science-Based  
25  
26 Jurisprudence of Dangerousness. California Law Review: Berkely, School of Law; 2015.  
27  
28  
29 22. Tippetts AS, Voas RB, Fell JC, Nichols JL. A meta-analysis of .08 BAC laws in 19 jurisdictions  
30  
31 in the United States. *Accid Anal Prev.* 2005;37(1):149-61.  
32  
33  
34 23. Villaveces A, Cummings P, Koepsell TD, Rivara FP, Lumley T, Moffat J. Association of alcohol-  
35  
36 related laws with deaths due to motor vehicle and motorcycle crashes in the United States, 1980-  
37  
38 1997. *Am J Epidemiol.* 2003;157(2):131-40.  
39  
40  
41 24. Governors Highway Safety Association. Drug Impaired Driving. Washington, DC; 2019 [cited  
42  
43 June 20, 2019]. Available from: [https://www.ghsa.org/state-](https://www.ghsa.org/state-laws/issues/drug%20impaired%20driving)  
44  
45 [laws/issues/drug%20impaired%20driving](https://www.ghsa.org/state-laws/issues/drug%20impaired%20driving).  
46  
47  
48 25. Alaska Department of Health and Social Services. Get the facts about marijuana. Anchorage,  
49  
50 Alaska: Office of Substance Misuse and Addiction Prevention, Division of Public Health, Alaska  
51  
52 Department of Health and Social Services; 2019 [cited June 17, 2020]. Available from:  
53  
54 <http://dhss.alaska.gov/dph/Director/Pages/marijuana/facts.aspx>.  
55  
56  
57  
58  
59  
60

- 1  
2  
3 26. Alaska Department of Health and Social Services. Marijuana use and public health in Alaska -  
4  
5 2020. Anchorage, Alaska: Office of Substance Misuse and Addiction Prevention, Division of  
6  
7 Public Health, Alaska Department of Health and Social Services; 2020 [cited June 17, 2020].  
8  
9 Available from:  
10  
11 [http://dhss.alaska.gov/dph/Director/Documents/marijuana/MarijuanaUse\\_PublicHealth\\_Alaska\\_2020.pdf](http://dhss.alaska.gov/dph/Director/Documents/marijuana/MarijuanaUse_PublicHealth_Alaska_2020.pdf).  
12  
13  
14  
15  
16  
17 27. California Courts. Proposition 64: Adult Use of Marijuana Act. San Francisco, California: Judicial  
18  
19 Council of California; 2016 [cited June 18, 2020]. Available from:  
20  
21 <https://www.courts.ca.gov/documents/prop64-Memo-20161110.pdf>.  
22  
23  
24 28. State of California. First day of legal commercial cannabis activity. Sacramento, California:  
25  
26 Bureau of Cannabis Control; 2018 [cited June 18, 2020]. Available from:  
27  
28 <https://cannabis.ca.gov/2018/01/01/more-than-400-state-licensed-cannabis-businesses-operating-on-californias-first-day-of-legal-commercial-cannabis-activity/>.  
29  
30  
31  
32  
33 29. State of Colorado. Permanent rules related to the Colorado retail marijuana code. Denver,  
34  
35 Colorado: Colorado Department of Revenue, Marijuana Enforcement Division; 2013 [cited June  
36  
37 20, 2020]. Available from:  
38  
39 [https://www.colorado.gov/pacific/sites/default/files/Retail%20Marijuana%20Rules,%20Adopted%20090913,%20Effective%20101513%5B1%5D\\_0.pdf](https://www.colorado.gov/pacific/sites/default/files/Retail%20Marijuana%20Rules,%20Adopted%20090913,%20Effective%20101513%5B1%5D_0.pdf).  
40  
41  
42  
43  
44 30. State of Colorado. Marijuana legalization in Colorado: early findings. Denver, Colorado: Colorado  
45  
46 Department of Public Safety, Division of Criminal Justice, Office of Research and Statistics; 2016  
47  
48 [cited June 18, 2020]. Available from: <https://cdpsdocs.state.co.us/ors/docs/reports/2016-SB13-283-Rpt.pdf>.  
49  
50  
51  
52  
53  
54  
55  
56  
57  
58  
59  
60

- 1  
2  
3 31. District of Columbia. The facts on DC marijuana laws. Washington, DC: Metropolitan Police  
4 Department; 2020 [cited June 18, 2020]. Available from: <https://mpdc.dc.gov/marijuana>.  
5  
6  
7  
8 32. State of Illinois. Gov. Pritzker signs most equity-centric law in nation to legalize adult-use  
9 cannabis. Springfield, Illinois: Office of the Governor; 2019 [cited June 18, 2020]. Available from:  
10  
11 <https://www2.illinois.gov/Pages/news-item.aspx?ReleaseID=20242>.  
12  
13  
14 33. State of Maine. Recreational marijuana in Maine. Augusta, Maine: Maine Legislature; 2020 [cited  
15 June 18, 2020]. Available from:  
16  
17 [https://legislature.maine.gov/lawlibrary/recreational\\_marijuana\\_in\\_maine/9419](https://legislature.maine.gov/lawlibrary/recreational_marijuana_in_maine/9419).  
18  
19  
20  
21 34. Portland Press Herald. Virus worries may further delay start of recreational marijuana market.  
22 March 24, 2020 [cited June 18, 2020]. Available from:  
23  
24 [https://www.pressherald.com/2020/03/24/virus-worries-may-further-delay-recreational-](https://www.pressherald.com/2020/03/24/virus-worries-may-further-delay-recreational-marijuana-in-maine/)  
25  
26 [marijuana-in-maine/](https://www.pressherald.com/2020/03/24/virus-worries-may-further-delay-recreational-marijuana-in-maine/).  
27  
28  
29  
30  
31 35. Portland Press Herald. Portland OKs temporary licenses for marijuana testers. April 29, 2020  
32 [cited June 18, 2020]. Available from: [https://www.pressherald.com/2020/04/28/portland-oks-](https://www.pressherald.com/2020/04/28/portland-oks-temporary-licenses-for-marijuana-testers/)  
33  
34 [temporary-licenses-for-marijuana-testers/](https://www.pressherald.com/2020/04/28/portland-oks-temporary-licenses-for-marijuana-testers/).  
35  
36  
37  
38 36. Commonwealth of Massachusetts. Frequently asked questions (FAQs) regarding laws governing  
39 adult use marijuana in Massachusetts. Worcester, Massachusetts: Commonwealth of  
40 Massachusetts, Cannabis Control Commission; 2020 [cited June 18, 2020]. Available from:  
41  
42 <http://cannabismass.wpengine.com/wp-content/uploads/2017/02/111717-FAQ-FINAL.pdf>.  
43  
44  
45  
46  
47 37. NBC News. Massachusetts makes history as first legal marijuana shops on East Coast open  
48 Tuesday. Northampton, Massachusetts: November 19, 2018 [cited June 18, 2020]. Available from:  
49  
50 [https://www.nbcnews.com/news/us-news/massachusetts-make-history-first-legal-marijuana-](https://www.nbcnews.com/news/us-news/massachusetts-make-history-first-legal-marijuana-shops-east-coast-set-n938136)  
51  
52 [shops-east-coast-set-n938136](https://www.nbcnews.com/news/us-news/massachusetts-make-history-first-legal-marijuana-shops-east-coast-set-n938136).  
53  
54  
55  
56  
57  
58  
59  
60

- 1  
2  
3 38. State of Michigan. Michigan Regulation and taxation of marijuana act. Lansing, Michigan: State  
4 of Michigan, Michigan Legislature; 2018 [cited June 18, 2020]. Available from:  
5  
6 [https://www.legislature.mi.gov/\(S\(0kujzj41pcz3hdfvjbwzvmwv\)\)/mileg.aspx?page=getObject&objectName=mcl-Initiated-Law-1-of-2018](https://www.legislature.mi.gov/(S(0kujzj41pcz3hdfvjbwzvmwv))/mileg.aspx?page=getObject&objectName=mcl-Initiated-Law-1-of-2018).  
7  
8  
9  
10  
11  
12 39. State of Michigan. Adult-use marijuana transfer window opens Sunday in Michigan. Lansing,  
13 Michigan: State of Michigan, Marijuana Regulatory Agency; 2019 [cited June 18, 2020].  
14 Available from: <https://www.michigan.gov/mra/0,9306,7-386-79784-513379--,00.html>.  
15  
16  
17  
18  
19 40. State of Michigan. Did you have to be fully licensed under the Medical Marijuana Facilities  
20 Licensing Act (MMFLA) before November 1, 2019 to be eligible to receive an adult-use license?  
21 Lansing, Michigan: State of Michigan, Marijuana Regulatory Agency; 2020 [cited June 18, 2020].  
22 Available from: <https://www.michigan.gov/mra/0,9306,7-386-83746-516597--,00.html>.  
23  
24  
25  
26  
27  
28 41. State of Nevada. Nevada marijuana law takes effect Jan. 1: Know the legal dos and don'ts. Carson  
29 City, Nevada: State of Nevada, Department of Taxation; 2016 [cited June 18, 2020]. Available  
30 from:  
31  
32 [https://marijuana.nv.gov/uploadedFiles/marijuanavgov/Content/Stay\\_Informed/Marijuana-Legal-Dos-and-Donts.pdf](https://marijuana.nv.gov/uploadedFiles/marijuanavgov/Content/Stay_Informed/Marijuana-Legal-Dos-and-Donts.pdf).  
33  
34  
35  
36  
37  
38  
39  
40 42. State of Nevada. Adult-use marijuana sales begin July 1 and Nevada officials want you to know  
41 how to stay legal and safe. Carson City, Nevada: State of Nevada, Department of Taxation; 2017  
42 [cited June 18, 2020]. Available from:  
43  
44 [https://marijuana.nv.gov/uploadedFiles/marijuanavgov/Content/Stay\\_Informed/Adult-Use%20Marijuana%20Sales%20and%20Licensed%20Stores.pdf](https://marijuana.nv.gov/uploadedFiles/marijuanavgov/Content/Stay_Informed/Adult-Use%20Marijuana%20Sales%20and%20Licensed%20Stores.pdf).  
45  
46  
47  
48  
49  
50  
51 43. State of Oregon. Oregon's recreational cannabis laws go into effect. Portland, Oregon: State of  
52 Oregon, Oregon Liquor Control Commission; 2015 [cited June 18, 2020]. Available from:  
53  
54  
55  
56  
57

1  
2  
3 [https://www.oregon.gov/olcc/docs/news/news\\_releases/2015/nr\\_06\\_30\\_15\\_Effective\\_date\\_medical\\_release6-30.pdf](https://www.oregon.gov/olcc/docs/news/news_releases/2015/nr_06_30_15_Effective_date_medical_release6-30.pdf).  
4  
5  
6

- 7  
8 44. State of Oregon. Early recreational marijuana sales to begin under Oregon Health Authority.  
9  
10 Portland, Oregon: State of Oregon, Oregon Liquor Control Commission; 2015 [cited June 18,  
11  
12 2020]. Available from:

13  
14 [https://www.oregon.gov/olcc/docs/news/news\\_releases/2015/nr\\_09\\_30\\_15\\_Early\\_Start\\_Marijuana.pdf](https://www.oregon.gov/olcc/docs/news/news_releases/2015/nr_09_30_15_Early_Start_Marijuana.pdf).  
15  
16  
17

- 18  
19 45. State of Oregon. OLCC licensed marijuana retailers set to open October 1st additional testing labs  
20  
21 come online. Portland, Oregon: State of Oregon, Oregon Liquor Control Commission; 2016 [cited  
22  
23 June 18, 2020]. Available from:

24  
25 [https://www.oregon.gov/olcc/docs/news/news\\_releases/2016/nr\\_093016\\_FirstRetailLicenses.pdf](https://www.oregon.gov/olcc/docs/news/news_releases/2016/nr_093016_FirstRetailLicenses.pdf)  
26  
27  
28

- 29  
30  
31 46. State of Vermont. Q & A for S.22 as passed by the Senate and House. Montpelier, Vermont: State  
32  
33 of Vermont, Office of Legislative Council; 2018 [cited June 18, 2020]. Available from:

34  
35 [https://marijuanacommission.vermont.gov/sites/mc/files/doc\\_library/Q%20%26%20A%20for%20S.%202022.pdf](https://marijuanacommission.vermont.gov/sites/mc/files/doc_library/Q%20%26%20A%20for%20S.%202022.pdf).  
36  
37  
38

- 39  
40 47. Washington State University. WSU outlines parameters for Initiative 502 marijuana law. Pullman,  
41  
42 Washington: Washington State University, WSU Insider; 2012 [cited June 18, 2020]. Available  
43  
44 from:

45 <https://news.wsu.edu/2012/12/05/wsu-outlines-parameters-for-initiative-502-marijuana-law/>.  
46  
47  
48

- 49 48. Washington State Liquor and Cannabis Board. FAQs on marijuana. Olympia, Washington:  
50  
51 Washington State Liquor and Cannabis Board; 2020 [cited June 18, 2020]. Available from:

52 [https://lcb.wa.gov/mj2015/faqs\\_i-502](https://lcb.wa.gov/mj2015/faqs_i-502).  
53  
54  
55

**Table 1.** United States jurisdictions with legalized recreational cannabis regulations\*

| Jurisdiction                    | Date Legalization in Effect | First Month Legalization in Effect for Primary Analysis <sup>†</sup> | Date Commercial Dispensaries Open      | First Month Commercial Dispensaries Open for Sensitivity Analysis <sup>†</sup> | Cannabis-Specific Impaired Driving Laws(24)                         |
|---------------------------------|-----------------------------|----------------------------------------------------------------------|----------------------------------------|--------------------------------------------------------------------------------|---------------------------------------------------------------------|
| <b>Alaska(25, 26)</b>           | February 24, 2015           | March 2015                                                           | October 29, 2016                       | November 2016                                                                  | None                                                                |
| <b>California(27, 28)</b>       | November 9, 2016            | November 2016                                                        | January 1, 2018                        | January 2018                                                                   | None                                                                |
| <b>Colorado(29, 30)</b>         | December 10, 2012           | December 2012                                                        | January 1, 2014                        | January 2014                                                                   | Reasonable inference for impairment $\geq 5$ ng/mL THC <sup>†</sup> |
| <b>District of Columbia(31)</b> | February 26, 2015           | March 2015                                                           | No Commercial Dispensaries             | N/A                                                                            | None                                                                |
| <b>Illinois(32)</b>             | January 1, 2020             | N/A                                                                  | January 1, 2020                        | N/A                                                                            | <i>Per se</i> limit $\geq 5$ ng/mL THC**                            |
| <b>Maine(33-35)</b>             | January 30, 2017            | February 2017                                                        | Mid-late 2020 (tentative) <sup>‡</sup> | N/A                                                                            | None                                                                |
| <b>Massachusetts(36, 37)</b>    | December 15, 2016           | December 2016                                                        | November 20, 2018                      | December 2018                                                                  | None                                                                |
| <b>Michigan(38-40)</b>          | December 6, 2018            | December 2018                                                        | December 1, 2019 <sup>§</sup>          | N/A                                                                            | Zero tolerance – no detectable presence of cannabis permitted       |
| <b>Nevada(41, 42)</b>           | January 1, 2017             | January 2017                                                         | July 1, 2017                           | July 2017                                                                      | <i>Per se</i> limit $\geq 2$ ng/mL THC**                            |
| <b>Oregon(43-45)</b>            | July 1, 2015                | July 2015                                                            | October 1, 2015 <sup>  </sup>          | October 2015                                                                   | None                                                                |
| <b>Vermont(46)</b>              | July 1, 2018                | July 2018                                                            | No Commercial Dispensaries             | N/A                                                                            | None                                                                |
| <b>Washington(47, 48)</b>       | December 6, 2012            | December 2012                                                        | July 8, 2014                           | July 2014                                                                      | <i>Per se</i> limit $\geq 5$ ng/mL THC**                            |

\* As of June 2020.

<sup>†</sup> Rounded up or down to the nearest full month of legalization (or commercial dispensaries opening); N/A = No data available for legalized (or commercial dispensaries open) months prior to 2019.

1  
2  
3 ‡ Delayed from June 2020 due to COVID-19 pandemic.

4 § On December 1, 2019, existing medical cannabis dispensaries in Michigan were permitted to transfer up to 50% of their medical  
5 cannabis inventory to recreational cannabis inventory. Until November 2021, retailers must hold a medical cannabis license in order to  
6 apply for a recreational cannabis license.  
7

8 ¶ On October 1, 2015, existing medical cannabis dispensaries in Oregon were permitted to sell recreational cannabis. The first licenses  
9 were issued to recreational cannabis retailers on October 1, 2016.

10 ¶ Reasonable inference requires that in addition to exceeding the THC limit, the jurisdiction must also prove that the driver was  
11 impaired with other evidence.

12 \*\* *Per se* limits do not require that the jurisdiction prove that the driver was impaired in order to charge them with driving under the  
13 influence if they exceeded the THC limit.  
14  
15  
16  
17  
18  
19  
20  
21  
22  
23  
24  
25  
26  
27  
28  
29  
30  
31  
32  
33  
34  
35  
36  
37  
38  
39  
40  
41  
42  
43  
44  
45  
46  
47

Confidential

1  
2  
3  
4  
5  
6  
7  
8  
9  
10  
11  
12  
13  
14  
15  
16  
17  
18  
19  
20  
21  
22  
23  
24  
25  
26  
27  
28  
29  
30  
31  
32  
33  
34  
35  
36  
37  
38  
39  
40  
41  
42  
43  
44  
45  
46  
47

**Table 2.** Fatal motor vehicle collisions and associated deaths in the United States from 2007-2018 by recreational cannabis legalization and opening of recreational cannabis dispensaries.

|                                             | Number of Events | Person-Years of Observation | Rate per 100,000 Person-Years* (95% CI) | Rate Ratio (95% CI)* |                  |
|---------------------------------------------|------------------|-----------------------------|-----------------------------------------|----------------------|------------------|
|                                             |                  |                             |                                         | Crude                | Adjusted†        |
| <b>Fatal Motor Vehicle Collisions</b>       |                  |                             |                                         |                      |                  |
| No Legalization                             | 372,280          | 3,572,373,096               | 10.6 (9.5-11.7)                         | 1.00 (ref)           | 1.00 (ref)       |
| Legalization                                | 17,116           | 206,984,000                 | 11.4 (10.2-12.7)                        | 1.08 (1.06-1.10)     | 1.09 (1.07-1.11) |
| No Open Dispensaries                        | 379,153          | 3,659,070,227               | 10.6 (9.5-11.7)                         | 1.00 (ref)           | 1.00 (ref)       |
| Open Dispensaries                           | 10,243           | 120,286,869                 | 11.3 (10.2-12.6)                        | 1.07 (1.05-1.10)     | 1.08 (1.05-1.10) |
| Overall                                     | 389,396          | 3,779,357,096               | 10.6 (9.5-11.8)                         | -                    | -                |
| <b>Deaths from Motor Vehicle Collisions</b> |                  |                             |                                         |                      |                  |
| No Legalization                             | 406,205          | 3,572,373,096               | 11.5 (10.4-12.8)                        | 1.00 (ref)           | 1.00 (ref)       |
| Legalization                                | 18,580           | 206,984,000                 | 12.4 (11.1-13.8)                        | 1.08 (1.06-1.10)     | 1.09 (1.07-1.11) |
| No Open Dispensaries                        | 413,635          | 3,659,070,227               | 11.6 (10.4-12.9)                        | 1.00 (ref)           | 1.00 (ref)       |
| Open Dispensaries                           | 11,150           | 120,286,869                 | 12.3 (11.1-13.8)                        | 1.07 (1.05-1.09)     | 1.08 (1.06-1.11) |
| Overall                                     | 424,785          | 3,779,357,096               | 11.6 (10.4-12.9)                        | -                    | -                |

Abbreviations: CI = Confidence Interval

\* Models included a random-effects term to account for clustering of data by jurisdiction.

† Adjusted for calendar year as a categorical variable.



**Table 3.** First 12 months versus subsequent months of fatal motor vehicle collisions and associated deaths in the United States from 2007-2018 by recreational cannabis legalization and opening of recreational cannabis dispensaries.

|                                                   | Number<br>of<br>Events | Person-Years<br>of<br>Observation | Rate per<br>100,000 Person-Years*<br>(95% CI) | Rate Ratio (95% CI)* |                       |
|---------------------------------------------------|------------------------|-----------------------------------|-----------------------------------------------|----------------------|-----------------------|
|                                                   |                        |                                   |                                               | Crude                | Adjusted <sup>†</sup> |
| <b>Fatal Motor Vehicle Collisions</b>             |                        |                                   |                                               |                      |                       |
| No Legalization                                   | 372,280                | 3,572,373,096                     | 10.6 (9.5-11.7)                               | 1.00 (ref)           | 1.00 (ref)            |
| First 12 Months of Legalization <sup>‡</sup>      | 5,802                  | 69,525,782                        | 11.4 (10.2-12.7)                              | 1.08 (1.05-1.11)     | 1.08 (1.05-1.11)      |
| Subsequent Months of Legalization                 | 11,314                 | 137,458,217                       | 11.4 (10.2-12.7)                              | 1.08 (1.06-1.10)     | 1.09 (1.07-1.12)      |
| First 12 Months vs Subsequent Months              | -                      | -                                 | -                                             | 1.00 (0.97-1.04)     | 0.99 (0.96-1.02)      |
| No Open Dispensaries                              | 413,635                | 3,659,070,227                     | 11.5 (10.4-12.8)                              | 1.00 (ref)           | 1.00 (ref)            |
| First 12 Months of Open Dispensaries <sup>‡</sup> | 5,426                  | 60,437,734                        | 11.9 (10.6-13.3)                              | 1.03 (1.001-1.06)    | 1.06 (1.03-1.09)      |
| Subsequent Months of Open Dispensaries            | 5,724                  | 59,849,135                        | 13.0 (11.6-14.5)                              | 1.12 (1.09-1.16)     | 1.12 (1.08-1.15)      |
| First 12 Months vs Subsequent Months              | -                      | -                                 | -                                             | 0.92 (0.88-0.95)     | 0.94 (0.91-0.98)      |
| Overall                                           | 389,396                | 3,779,357,096                     | 10.6 (9.5-11.8)                               | -                    | -                     |
| <b>Deaths from Motor Vehicle Collisions</b>       |                        |                                   |                                               |                      |                       |
| No Legalization                                   | 406,205                | 3,572,373,096                     | 11.5 (10.4-12.8)                              | 1.00 (ref)           | 1.00 (ref)            |
| First 12 Months of Legalization <sup>‡</sup>      | 6,290                  | 69,525,782                        | 12.4 (11.1-13.9)                              | 1.08 (1.05-1.11)     | 1.08 (1.05-1.11)      |
| Subsequent Months of Legalization                 | 12,290                 | 137,458,21                        | 12.4 (11.1-13.8)                              | 1.08 (1.05-1.10)     | 1.10 (1.07-1.12)      |
| First 12 Months vs Subsequent Months              | -                      | -                                 | -                                             | 1.00 (0.97-1.03)     | 1.01 (0.98-1.05)      |
| No open dispensaries                              | 413,635                | 3,659,070,227                     | 11.5 (10.4-12.8)                              | 1.00 (ref)           | 1.00 (ref)            |
| First 12 Months of Open Dispensaries <sup>‡</sup> | 5,426                  | 60,437,734                        | 11.9 (10.6-13.3)                              | 1.03 (1.001-1.06)    | 1.06 (1.03-1.09)      |
| Subsequent Months of Open Dispensaries            | 5,724                  | 59,849,135                        | 13.0 (11.6-14.5)                              | 1.12 (1.09-1.16)     | 1.12 (1.08-1.15)      |
| First 12 Months vs Subsequent Months              | -                      | -                                 | -                                             | 0.92 (0.88-0.95)     | 0.94 (0.91-0.98)      |
| Overall                                           | 424,785                | 3,779,357,096                     | 11.6 (10.4-12.9)                              | -                    | -                     |

Abbreviations: CI = Confidence Interval

\* Models included a random-effects term to account for clustering of data by jurisdiction.

1  
2  
3  
4  
5  
6  
7  
8  
9  
10  
11  
12  
13  
14  
15  
16  
17  
18  
19  
20  
21  
22  
23  
24  
25  
26  
27  
28  
29  
30  
31  
32  
33  
34  
35  
36  
37  
38  
39  
40  
41  
42  
43  
44  
45  
46  
47

† Adjusted for calendar year as a categorical variable.

‡ Includes up to 12 months for each jurisdiction (some jurisdictions contributed less than 12 months, depending on their dates of legalization and/or commercial dispensaries opening).

Confidential

**Supplementary Table 1.** Fatal motor vehicle collisions and associated deaths in the United States from 2007-2018 by recreational cannabis legalization and opening of recreational cannabis dispensaries, with calendar time modeled as a continuous variable.

|                                             | Number of Events | Person-Years of Observation | Rate per 100,000 Person-Years* (95% CI) | Rate Ratio (95% CI)* |                  |
|---------------------------------------------|------------------|-----------------------------|-----------------------------------------|----------------------|------------------|
|                                             |                  |                             |                                         | Crude                | Adjusted†        |
| <b>Fatal Motor Vehicle Collisions</b>       |                  |                             |                                         |                      |                  |
| No Legalization                             | 372,280          | 3,572,373,096               | 10.6 (9.5-11.7)                         | 1.00 (ref)           | 1.00 (ref)       |
| Legalization                                | 17,116           | 206,984,000                 | 11.4 (10.2-12.7)                        | 1.08 (1.06-1.10)     | 1.15 (1.12-1.17) |
| No Open Dispensaries                        | 379,153          | 3,659,070,227               | 10.6 (9.5-11.7)                         | 1.00 (ref)           | 1.00 (ref)       |
| Open Dispensaries                           | 10,243           | 120,286,869                 | 11.3 (10.2-12.6)                        | 1.07 (1.05-1.10)     | 1.13 (1.10-1.16) |
| Overall                                     | 389,396          | 3,779,357,096               | 10.6 (9.5-11.8)                         | -                    | -                |
| <b>Deaths from Motor Vehicle Collisions</b> |                  |                             |                                         |                      |                  |
| No Legalization                             | 406,205          | 3,572,373,096               | 11.5 (10.4-12.8)                        | 1.00 (ref)           | 1.00 (ref)       |
| Legalization                                | 18,580           | 206,984,000                 | 12.4 (11.1-13.8)                        | 1.08 (1.06-1.10)     | 1.15 (1.13-1.17) |
| No Open Dispensaries                        | 413,635          | 3,659,070,227               | 11.6 (10.4-12.9)                        | 1.00 (ref)           | 1.00 (ref)       |
| Open Dispensaries                           | 11,150           | 120,286,869                 | 12.3 (11.1-13.8)                        | 1.07 (1.05-1.09)     | 1.14 (1.11-1.16) |
| Overall                                     | 424,785          | 3,779,357,096               | 11.6 (10.4-12.9)                        | -                    | -                |

Abbreviations: CI = Confidence Interval

\* Models included a random-effects term to account for clustering of data by jurisdiction.

† Adjusted for calendar year as a continuous variable.

1  
2  
3  
4  
5  
6  
7  
8  
9  
10  
11  
12  
13  
14  
15  
16  
17  
18  
19  
20  
21  
22  
23  
24  
25  
26  
27  
28  
29  
30  
31  
32  
33  
34  
35  
36  
37  
38  
39  
40  
41  
42  
43  
44  
45  
46  
47

**Supplementary Table 2.** First 12 months versus subsequent months of fatal motor vehicle collisions and associated deaths in the United States from 2007-2018 by recreational cannabis legalization and opening of recreational cannabis dispensaries, with calendar time modeled as a continuous variable.

|                                             | Number of Events | Person-Years of Observation | Rate per 100,000 Person-Years* (95% CI) | Rate Ratio (95% CI)* |                  |
|---------------------------------------------|------------------|-----------------------------|-----------------------------------------|----------------------|------------------|
|                                             |                  |                             |                                         | Crude                | Adjusted †       |
| <b>Fatal Motor Vehicle Collisions</b>       |                  |                             |                                         |                      |                  |
| No Legalization                             | 372,280          | 3,572,373,096               | 10.6 (9.5-11.7)                         | 1.00 (ref)           | 1.00 (ref)       |
| First 12 Months of Legalization‡            | 5,802            | 69,525,782                  | 11.4 (10.2-12.7)                        | 1.08 (1.05-1.11)     | 1.14 (1.11-1.17) |
| Subsequent Months of Legalization           | 11,314           | 137,458,217                 | 11.4 (10.2-12.7)                        | 1.08 (1.06-1.10)     | 1.15 (1.13-1.18) |
| First 12 Months vs Subsequent Months        | -                | -                           | -                                       | 1.00 (0.97-1.04)     | 0.99 (0.96-1.02) |
| No Open Dispensaries                        | 413,635          | 3,659,070,227               | 11.5 (10.4-12.8)                        | 1.00 (ref)           | 1.00 (ref)       |
| First 12 Months of Open Dispensaries‡       | 5,426            | 60,437,734                  | 11.9 (10.6-13.3)                        | 1.03 (1.001-1.06)    | 1.08 (1.05-1.11) |
| Subsequent Months of Open Dispensaries      | 5,724            | 59,849,135                  | 13.0 (11.6-14.5)                        | 1.12 (1.09-1.16)     | 1.20 (1.16-1.24) |
| First 12 Months vs Subsequent Months        | -                | -                           | -                                       | 0.92 (0.88-0.95)     | 0.90 (0.86-0.94) |
| Overall                                     | 389,396          | 3,779,357,096               | 10.6 (9.5-11.8)                         | -                    | -                |
| <b>Deaths from Motor Vehicle Collisions</b> |                  |                             |                                         |                      |                  |
| No Legalization                             | 406,205          | 3,572,373,096               | 11.5 (10.4-12.8)                        | 1.00 (ref)           | 1.00 (ref)       |
| First 12 Months of Legalization‡            | 6,290            | 69,525,782                  | 12.4 (11.1-13.9)                        | 1.08 (1.05-1.11)     | 1.14 (1.11-1.17) |
| Subsequent Months of Legalization           | 12,290           | 137,458,21                  | 12.4 (11.1-13.8)                        | 1.08 (1.05-1.10)     | 1.16 (1.13-1.18) |
| First 12 Months vs Subsequent Months        | -                | -                           | -                                       | 1.00 (0.97-1.03)     | 0.98 (0.95-1.02) |
| No Open Dispensaries                        | 413,635          | 3,659,070,227               | 11.5 (10.4-12.8)                        | 1.00 (ref)           | 1.00 (ref)       |
| First 12 Months of Open Dispensaries‡       | 5,426            | 60,437,734                  | 11.9 (10.6-13.3)                        | 1.03 (1.001-1.06)    | 1.09 (1.06-1.12) |
| Subsequent Months of Open Dispensaries      | 5,724            | 59,849,135                  | 13.0 (11.6-14.5)                        | 1.12 (1.09-1.16)     | 1.20 (1.16-1.24) |
| First 12 Months vs Subsequent Months        | -                | -                           | -                                       | 0.92 (0.88-0.95)     | 0.91 (0.87-0.94) |
| Overall                                     | 424,785          | 3,779,357,096               | 11.6 (10.4-12.9)                        | -                    | -                |

1  
2  
3 Abbreviations: CI = Confidence Interval

4 \* Models included a random-effects term to account for clustering of data by jurisdiction.

5 † Adjusted for calendar year as a categorical variable.

6 ‡ Includes up to 12 months for each jurisdiction (some jurisdictions contributed less than 12 months, depending on their dates of  
7 legalization and/or commercial dispensaries opening).  
8  
9  
10  
11  
12  
13  
14  
15  
16  
17  
18  
19  
20  
21  
22  
23  
24  
25  
26  
27  
28  
29  
30  
31  
32  
33  
34  
35  
36  
37  
38  
39  
40  
41  
42  
43  
44  
45  
46  
47

Confidential

STROBE Statement—Checklist of items that should be included in reports of *cohort studies*

|                           | Item No | Recommendation                                                                                                                                                                                    | Page No      |
|---------------------------|---------|---------------------------------------------------------------------------------------------------------------------------------------------------------------------------------------------------|--------------|
| <b>Title and abstract</b> | 1       | (a) Indicate the study's design with a commonly used term in the title or the abstract                                                                                                            | 1            |
|                           |         | (b) Provide in the abstract an informative and balanced summary of what was done and what was found                                                                                               | 2            |
| <b>Introduction</b>       |         |                                                                                                                                                                                                   |              |
| Background/rationale      | 2       | Explain the scientific background and rationale for the investigation being reported                                                                                                              | 3            |
| Objectives                | 3       | State specific objectives, including any prespecified hypotheses                                                                                                                                  | 3            |
| <b>Methods</b>            |         |                                                                                                                                                                                                   |              |
| Study design              | 4       | Present key elements of study design early in the paper                                                                                                                                           | 3-4          |
| Setting                   | 5       | Describe the setting, locations, and relevant dates, including periods of recruitment, exposure, follow-up, and data collection                                                                   | 4            |
| Participants              | 6       | (a) Give the eligibility criteria, and the sources and methods of selection of participants. Describe methods of follow-up                                                                        | 4            |
|                           |         | (b) For matched studies, give matching criteria and number of exposed and unexposed                                                                                                               | N/A          |
| Variables                 | 7       | Clearly define all outcomes, exposures, predictors, potential confounders, and effect modifiers. Give diagnostic criteria, if applicable                                                          | 4-5          |
| Data sources/measurement  | 8*      | For each variable of interest, give sources of data and details of methods of assessment (measurement). Describe comparability of assessment methods if there is more than one group              | 4            |
| Bias                      | 9       | Describe any efforts to address potential sources of bias                                                                                                                                         | 4-5          |
| Study size                | 10      | Explain how the study size was arrived at                                                                                                                                                         | 4-5          |
| Quantitative variables    | 11      | Explain how quantitative variables were handled in the analyses. If applicable, describe which groupings were chosen and why                                                                      | 4-5          |
| Statistical methods       | 12      | (a) Describe all statistical methods, including those used to control for confounding                                                                                                             | 4-5          |
|                           |         | (b) Describe any methods used to examine subgroups and interactions                                                                                                                               | 4-5          |
|                           |         | (c) Explain how missing data were addressed                                                                                                                                                       | N/A          |
|                           |         | (d) If applicable, explain how loss to follow-up was addressed                                                                                                                                    | N/A          |
|                           |         | (e) Describe any sensitivity analyses                                                                                                                                                             | 5            |
| <b>Results</b>            |         |                                                                                                                                                                                                   |              |
| Participants              | 13*     | (a) Report numbers of individuals at each stage of study—eg numbers potentially eligible, examined for eligibility, confirmed eligible, included in the study, completing follow-up, and analysed | 5-6          |
|                           |         | (b) Give reasons for non-participation at each stage                                                                                                                                              | N/A          |
|                           |         | (c) Consider use of a flow diagram                                                                                                                                                                | N/A          |
| Descriptive data          | 14*     | (a) Give characteristics of study participants (eg demographic, clinical, social) and information on exposures and potential confounders                                                          | 6-7; Table 1 |
|                           |         | (b) Indicate number of participants with missing data for each variable of interest                                                                                                               | N/A          |
|                           |         | (c) Summarise follow-up time (eg, average and total amount)                                                                                                                                       | N/A          |
| Outcome data              | 15*     | Report numbers of outcome events or summary measures over time                                                                                                                                    | 5-6          |

|    |                          |    |                                                                                                                                                                                                              |                       |
|----|--------------------------|----|--------------------------------------------------------------------------------------------------------------------------------------------------------------------------------------------------------------|-----------------------|
| 1  | Main results             | 16 | (a) Give unadjusted estimates and, if applicable, confounder-adjusted estimates and their precision (eg, 95% confidence interval). Make clear which confounders were adjusted for and why they were included | 5-6;<br>Tables<br>2-3 |
| 2  |                          |    | (b) Report category boundaries when continuous variables were categorized                                                                                                                                    | N/A                   |
| 3  |                          |    | (c) If relevant, consider translating estimates of relative risk into absolute risk for a meaningful time period                                                                                             | 7                     |
| 4  |                          |    |                                                                                                                                                                                                              |                       |
| 5  | Other analyses           | 17 | Report other analyses done—eg analyses of subgroups and interactions, and sensitivity analyses                                                                                                               | 6-7                   |
| 6  |                          |    |                                                                                                                                                                                                              |                       |
| 7  |                          |    |                                                                                                                                                                                                              |                       |
| 8  |                          |    |                                                                                                                                                                                                              |                       |
| 9  |                          |    |                                                                                                                                                                                                              |                       |
| 10 |                          |    |                                                                                                                                                                                                              |                       |
| 11 | <b>Discussion</b>        |    |                                                                                                                                                                                                              |                       |
| 12 | Key results              | 18 | Summarise key results with reference to study objectives                                                                                                                                                     | 7                     |
| 13 | Limitations              | 19 | Discuss limitations of the study, taking into account sources of potential bias or imprecision. Discuss both direction and magnitude of any potential bias                                                   | 10-11                 |
| 14 | Interpretation           | 20 | Give a cautious overall interpretation of results considering objectives, limitations, multiplicity of analyses, results from similar studies, and other relevant evidence                                   | 7-10                  |
| 15 | Generalisability         | 21 | Discuss the generalisability (external validity) of the study results                                                                                                                                        | 10                    |
| 16 |                          |    |                                                                                                                                                                                                              |                       |
| 17 | <b>Other information</b> |    |                                                                                                                                                                                                              |                       |
| 18 | Funding                  | 22 | Give the source of funding and the role of the funders for the present study and, if applicable, for the original study on which the present article is based                                                | 1                     |
| 19 |                          |    |                                                                                                                                                                                                              |                       |
| 20 |                          |    |                                                                                                                                                                                                              |                       |
| 21 |                          |    |                                                                                                                                                                                                              |                       |
| 22 |                          |    |                                                                                                                                                                                                              |                       |
| 23 |                          |    |                                                                                                                                                                                                              |                       |
| 24 |                          |    |                                                                                                                                                                                                              |                       |
| 25 |                          |    |                                                                                                                                                                                                              |                       |
| 26 |                          |    |                                                                                                                                                                                                              |                       |
| 27 |                          |    |                                                                                                                                                                                                              |                       |
| 28 |                          |    |                                                                                                                                                                                                              |                       |
| 29 |                          |    |                                                                                                                                                                                                              |                       |
| 30 |                          |    |                                                                                                                                                                                                              |                       |
| 31 |                          |    |                                                                                                                                                                                                              |                       |
| 32 |                          |    |                                                                                                                                                                                                              |                       |
| 33 |                          |    |                                                                                                                                                                                                              |                       |
| 34 |                          |    |                                                                                                                                                                                                              |                       |
| 35 |                          |    |                                                                                                                                                                                                              |                       |
| 36 |                          |    |                                                                                                                                                                                                              |                       |
| 37 |                          |    |                                                                                                                                                                                                              |                       |
| 38 |                          |    |                                                                                                                                                                                                              |                       |
| 39 |                          |    |                                                                                                                                                                                                              |                       |
| 40 |                          |    |                                                                                                                                                                                                              |                       |
| 41 |                          |    |                                                                                                                                                                                                              |                       |
| 42 |                          |    |                                                                                                                                                                                                              |                       |
| 43 |                          |    |                                                                                                                                                                                                              |                       |
| 44 |                          |    |                                                                                                                                                                                                              |                       |
| 45 |                          |    |                                                                                                                                                                                                              |                       |
| 46 |                          |    |                                                                                                                                                                                                              |                       |
| 47 |                          |    |                                                                                                                                                                                                              |                       |
| 48 |                          |    |                                                                                                                                                                                                              |                       |
| 49 |                          |    |                                                                                                                                                                                                              |                       |
| 50 |                          |    |                                                                                                                                                                                                              |                       |
| 51 |                          |    |                                                                                                                                                                                                              |                       |
| 52 |                          |    |                                                                                                                                                                                                              |                       |
| 53 |                          |    |                                                                                                                                                                                                              |                       |
| 54 |                          |    |                                                                                                                                                                                                              |                       |
| 55 |                          |    |                                                                                                                                                                                                              |                       |
| 56 |                          |    |                                                                                                                                                                                                              |                       |
| 57 |                          |    |                                                                                                                                                                                                              |                       |
| 58 |                          |    |                                                                                                                                                                                                              |                       |
| 59 |                          |    |                                                                                                                                                                                                              |                       |
| 60 |                          |    |                                                                                                                                                                                                              |                       |

\*Give information separately for exposed and unexposed groups.

**Note:** An Explanation and Elaboration article discusses each checklist item and gives methodological background and published examples of transparent reporting. The STROBE checklist is best used in conjunction with this article (freely available on the Web sites of PLoS Medicine at <http://www.plosmedicine.org/>, Annals of Internal Medicine at <http://www.annals.org/>, and Epidemiology at <http://www.epidem.com/>). Information on the STROBE Initiative is available at <http://www.strobe-statement.org>.
